# Supplementary material
Source: publisher site journal article supplement (https://www.dovepress.com/article/598948)
Supplement: Supplementary file 1 [file 598948%20Supplementary%20Materials.docx]

**Supplementary Table 1. Diagnostic performance of inflammatory and nutritional biomarkers for predicting pathological complete response (pCR) and radiological response in patients with HER2-positive breast cancer treated with neoadjuvant dual anti-HER2 therapy**

| **Biomarker** | **Outcome** | **AUC (95% CI)** | **Optimal cutoff (Youden index)** | **Sensitivity (%)** | **Specificity (%)** | **PPV (%)** | **NPV (%)** | **Accuracy (%)** |
| --- | --- | --- | --- | --- | --- | --- | --- | --- |
| **SII** | pCR | 0.737 (0.646–0.827) | 798 | 65.6 | 86.1 | 84.2 | 69.0 | 75.2 |
|  | Radiological response | 0.713 (0.607–0.818) | 798 | 70.7 | 75.8 | 94.2 | 32.0 | 71.3 |
| **CAR** | pCR | 0.722 (0.635–0.810) | 0.23 | 53.1 | 94.4 | 91.4 | 64.1 | 72.5 |
|  | Radiological response | 0.721 (0.626–0.817) | 0.23 | 56.1 | 84.2 | 95.1 | 25.9 | 60.4 |
| **LMR** | pCR | 0.793 (0.715–0.871) | 2.98 | 98.6 | 51.6 | 69.6 | 97.0 | 76.5 |
|  | Radiological response | 0.785 (0.705–0.866) | 2.98 | 97.3 | 51.6 | 91.8 | 78.6 | 90.4 |

**Abbreviations:** AUC: Area under the curve, CAR: C-reactive protein–to–albumin ratio, CI: Confidence interval, LMR: Lymphocyte-to-monocyte ratio, NPV: Negative predictive value, pCR: Pathological complete response, PPV: Positive predictive value, SII: Systemic immune-inflammation index.

Optimal cutoff values were determined using the Youden index. Sensitivity, specificity, positive predictive value (PPV), negative predictive value (NPV), and accuracy were calculated based on these cutoff values. Receiver operating characteristic (ROC) curve analyses were performed to estimate the area under the curve (AUC) with corresponding 95% confidence intervals (CIs).

**Supplementary Table 2. Univariable logistic regression analyses of clinicopathological and laboratory parameters associated with pathological complete response and radiological response in patients with HER2-positive breast cancer treated with neoadjuvant dual anti-HER2 therapy**

| **Parameters (n=136)** | **Pcr** | | **Radiological Response** | |
| --- | --- | --- | --- | --- |
| **P value** | **OR (95% CI)** | **P value** | **OR (95% CI)** |
| Age | 0.227 | 0.59 (0.25-1.40) | 0.552 | 0.72 (0.24-2.12) |
| ECOG-PS | 0.603 | 0.76 (0.27-2.12) | 0.654 | 1.43 (0.30-6.24) |
| Smoking History | 0.541 | 1.24 (0.63-2.44) | 0.312 | 1.65 (0.62-4.39) |
| Menopausal Status | 0.183 | 0.63 (0.31-1.25) | 0.924 | 1.05 (0.41-2.68) |
| Diabetes at Diagnosis | **0.022** | **0.29 (0.10-0.87)** | 0.877 | 0.90 (0.24-3.43) |
| Baseline Lipid-Lowering Therapy | 0.883 | 0.88 (0.17-2.54) | 0.215 | 0.34 (0.06-2.01) |
| Baseline Metformin Use | **0.004** | **0.17 (0.05-0.63)** | 0.697 | 0.77 (0.20-2.96) |
| ER Expression (<1% vs. Others) | **<0.001** | **1.99 (1.47-2.69)** | 0.078 | 1.14 (0.98-1.30) |
| ER Expression (1-10% vs. Others) | 0.491 | 0.55 (0.10-3.10) | 0.284 | 1.19 (1.11-1.29) |
| ER Expression (≥10 vs. Others) | **<0.001** | **0.49 (0.35-0.69)** | **0.030** | **0.85 (0.75-0.98)** |
| PR Expression (<1% vs. Others) | **<0.001** | **1.98 (1.35-2.89)** | 0.088 | 1.14 (0.97-1.32) |
| PR Expression (1-10% vs. Others) | 0.101 | 2.78 (0.81-9.52) | 0.995 | 0.99 (0.20-4.85) |
| PR Expression (≥10 vs. Others) | **0.002** | **0.57 (0.37-0.89)** | 0.075 | 0.87 (0.73-1.03) |
| mCCI | 0.589 | 0.83 (0.41-1.65) | 0.989 | 1.01 (0.39-2.62) |
| Hemoglobin (g/dL) | 0.788 | 1.15 (0.43-3.09) | 0.877 | 1.11 (0.29-4.22) |
| Ki-67 (≤20% vs. Others) | 0.160 | 1.81 (0.79-4.16) | 0.762 | 1.19 (0.39-3.56) |
| Ki-67 (20-30% vs. Others) | 0.299 | 1.72 (0.61-4.82) | **0.015** | **3.78 (1.22-11.74)** |
| Ki-67 (≥30% vs. Others) | **0.039** | **0.49 (0.24-0.98)** | **0.046** | **0.40 (0.15-0.96)** |
| Histologic Grade | 0.882 | 1.06 (0.52-2.13) | 0.199 | 1.84 (0.72-4.72) |
| Tumor size | 0.675 | 0.82 (0.32-2.09) | 0.619 | 1.36 (0.41-4.56) |
| Clinical T Stage | 0.138 | 0.49 (0.19-1.27) | 0.567 | 0.74 (0.22-2.46) |
| Clinical N Stage | 0.736 | 1.13 (0.56-2.27) | 0.478 | 1.41 (0.55-3.62) |
| CEA Level at Treatment Initiation | **0.026** | **0.32 (0.12-0.91)** | 0.953 | 1.04 (0.28-3.92) |
| Ca15-3 Level at Treatment Initiation | **0.003** | **0.23 (0.09-0.63)** | **0.001** | **0.20 (0.07-0.55)** |
| HER2 Expression | **0.013** | **1.81 (1.29-2.54)** | **0.027** | **2.72 (1.18-6.30)** |
| Baseline BMI at Diagnosis (kg/m²) | 0.427 | 0.73 (0.33-1.60) | 0.681 | 1.24 (0.44-3.51) |
| Weight Loss During Treatment (10%) | 0.936 | 0.96 (0.39-2.36) | 0.776 | 0.84 (0.25-2.78) |
| SII | **<0.001** | **0.08 (0.04-0.19)** | **0.047** | **0.40 (0.15-0.97)** |
| CAR | **0.001** | **0.05 (0.02-0.16)** | **0.007** | **0.28 (0.11-0.73)** |
| LMR | **<0.001** | **3.19 (2.37-4.31)** | **0.002** | **4.00 (1.85-8.66)** |

**Abbreviations:** BMI – Body mass index, CA 15-3 – Cancer antigen 15-3, CAR – C-reactive protein-to-albumin ratio, CEA – Carcinoembryonic antigen, CI – Confidence interval, ECOG-PS – Eastern Cooperative Oncology Group Performance Status, ER – Estrogen receptor, HER2 – Human epidermal growth factor receptor 2, Ki-67 – Ki-67 proliferation index, LMR – Lymphocyte-to-monocyte ratio, mCCI – Modified Charlson Comorbidity Index, N – Node (clinical nodal stage), OR – Odds ratio, pCR – Pathological complete response, PR – Progesterone receptor, SII – Systemic immune-inflammation index, T – Tumor (clinical T stage). Values in bold indicate statistically significant results (p < 0.05).

Odds ratios (ORs) and 95% confidence intervals (CIs) were obtained from univariable logistic regression analyses. For categorical variables, the reference category is indicated in parentheses. Continuous variables were analyzed per unit increase unless otherwise specified. Variables with a p value <0.10 in univariable analyses were considered candidates for inclusion in multivariable logistic regression models.

**Supplementary Table 3. Predictive performance metrics of exploratory random forest models for pathological complete response and radiological response**

| **Metric** | **pCR Model** |  | **RR Model** |
| --- | --- | --- | --- |
| AUC (95% CI) | 0.995 (0.981–1.000) |  | 0.791 (0.599–0.984) |
| Accuracy (%) | 96.4 |  | 78.6 |
| Sensitivity (%) | 100 |  | 94.7 |
| Specificity (%) | 92.9 |  | 44.4 |
| F1-score | 96.6 |  | 78.3 |
| Balanced Accuracy (%) | 96.5 |  | 79.6 |
| Cohen’s κ | 0.93 |  | 0.54 |
| MCC | 0.93 |  | 0.57 |

**Abbreviations:** AUC: Area under the curve, CI: Confidence interval, MCC: Matthews correlation coefficient, pCR: Pathological complete response, RR: Radiological response

Random forest models were developed as exploratory analyses to complement regression-based findings. Performance metrics were calculated at the optimal probability threshold determined by the Youden index.

**Supplementary Figure 1. Diagnostic performance of inflammatory and nutritional biomarkers for treatment response**


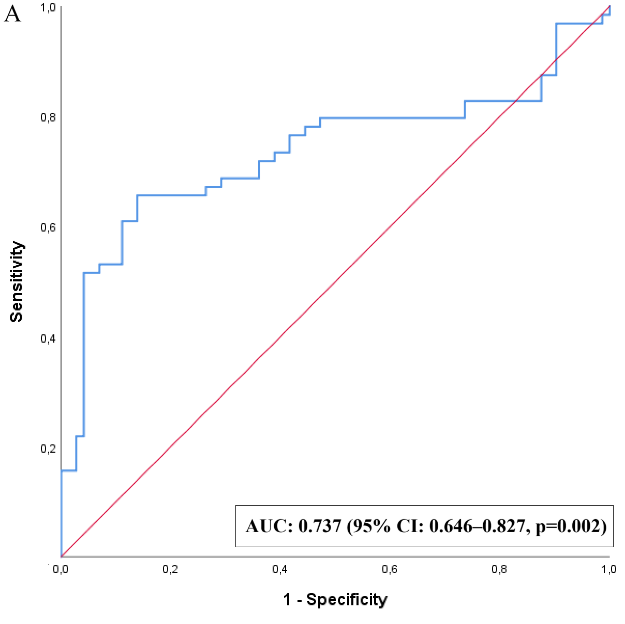


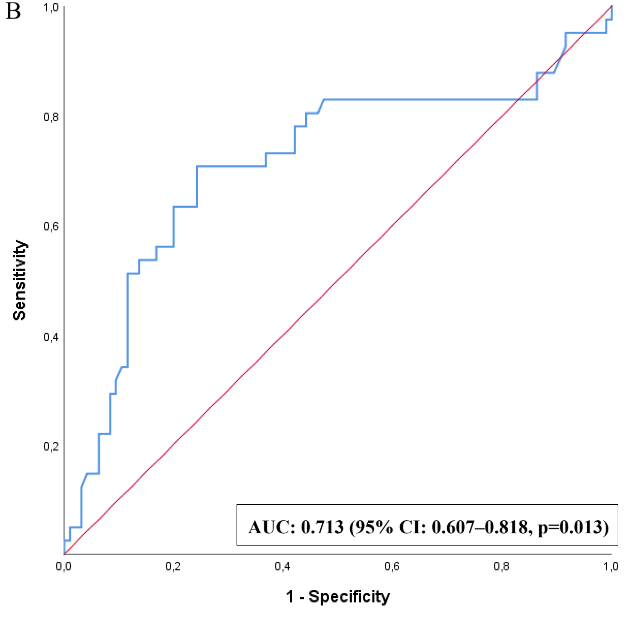


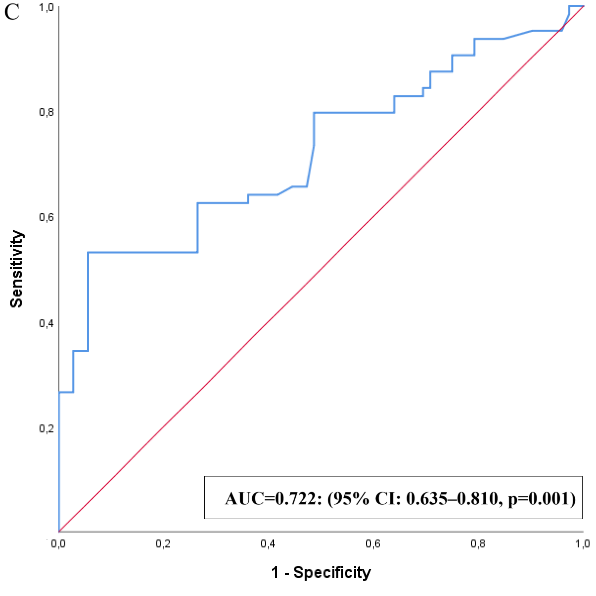


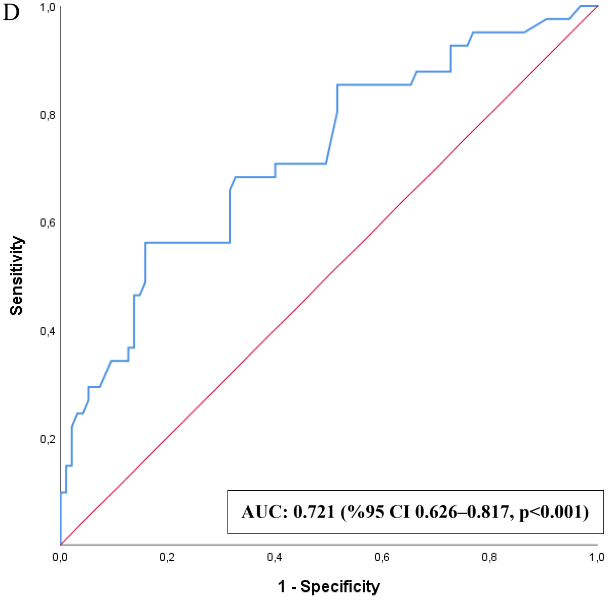


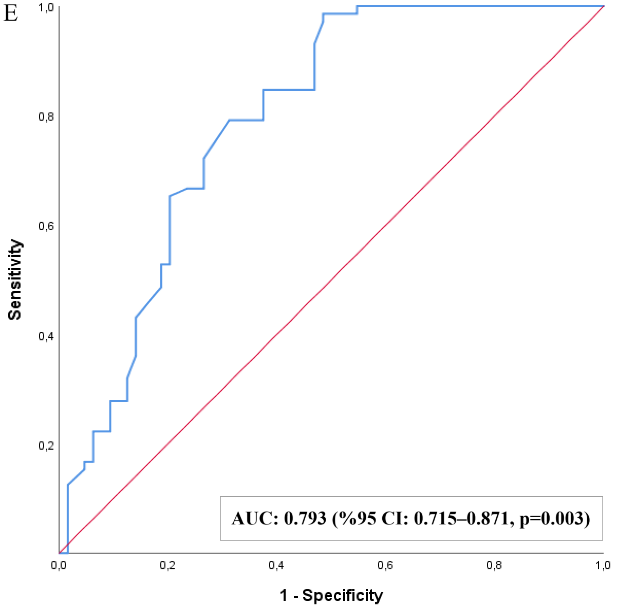


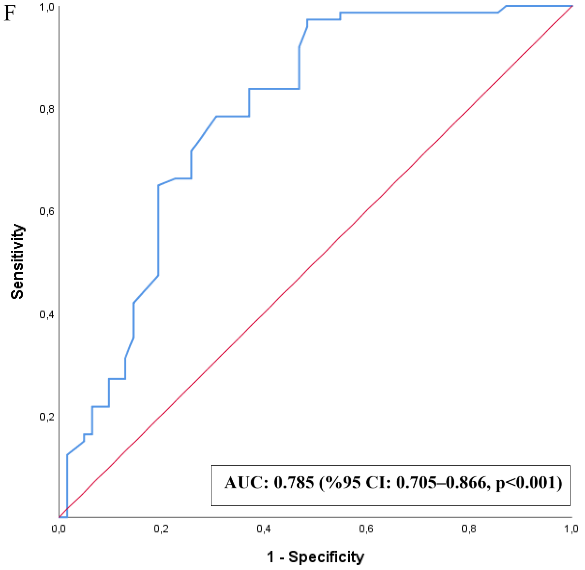


**Abbreviations:** AUC, area under the curve; CAR, C-reactive protein–to–albumin ratio; CI, confidence interval; LMR, lymphocyte-to-monocyte ratio; pCR, pathological complete response; PPV, positive predictive value; SII, systemic immune-inflammation index

Receiver operating characteristic (ROC) analyses evaluating the diagnostic performance of inflammatory and nutritional biomarkers for predicting pathological complete response (pCR) and radiological response in patients with HER2-positive breast cancer treated with neoadjuvant dual anti-HER2 therapy. Panels show ROC curves for (A) SII predicting pCR, (B) CAR predicting pCR, (C) LMR predicting pCR, (D) SII predicting radiological response, (E) CAR predicting radiological response, and (F) LMR predicting radiological response.

Areas under the curve (AUCs) with corresponding 95% confidence intervals (CIs) were calculated for each biomarker. Optimal cutoff values were determined using the Youden index. Detailed diagnostic performance metrics, including sensitivity, specificity, positive predictive value (PPV), negative predictive value (NPV), and accuracy, are provided in Supplementary Table 1.

**Supplementary Figure 2. Receiver operating characteristic (ROC) curves of random forest models for prediction of pathological complete response and radiological response**


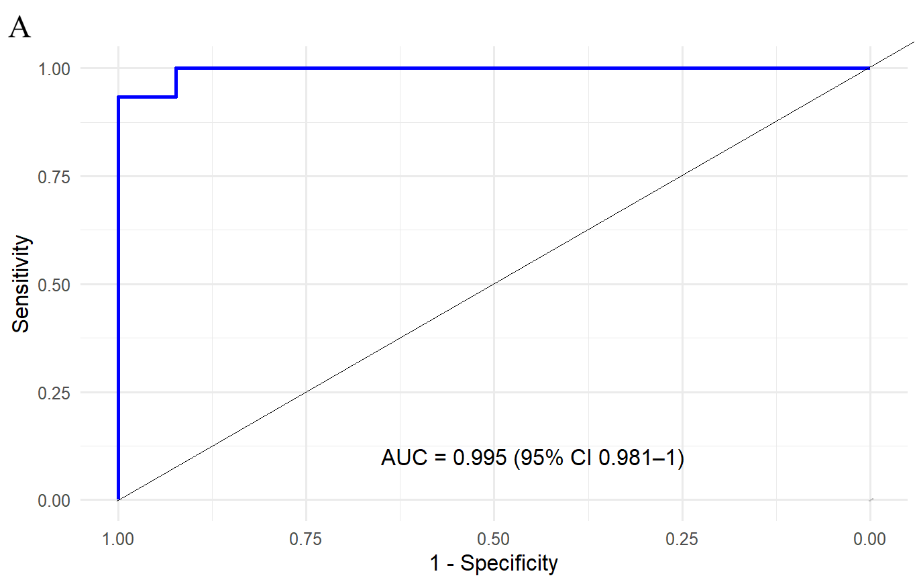


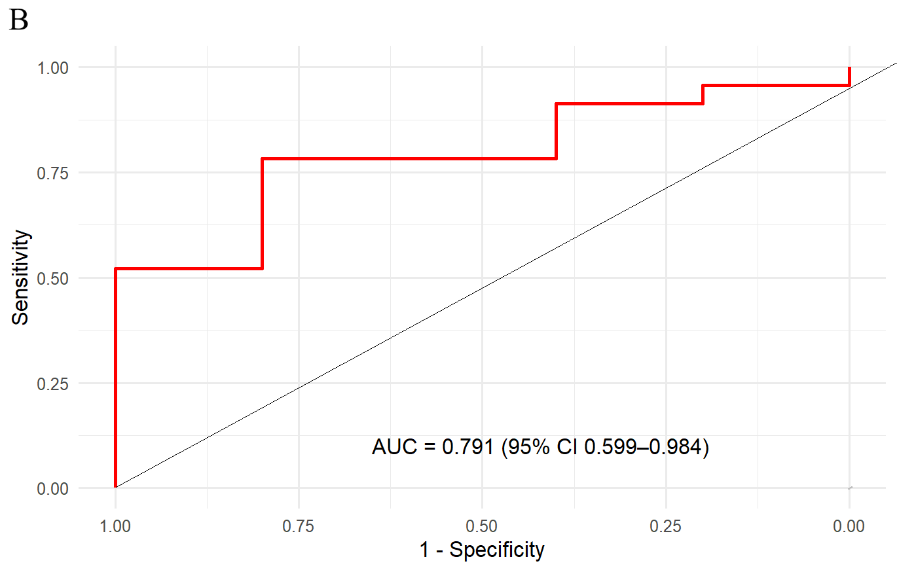


**Abbreviations:** AUC, area under the curve; CI, confidence interval; pCR, pathological complete response; ROC, receiver operating characteristic

Receiver operating characteristic (ROC) curves illustrate the discriminative performance of random forest classifiers for prediction of pathological complete response (pCR) (Panel A) and radiological response (Panel B). Model performance was evaluated using the area under the curve (AUC) with 95% confidence intervals. Optimal probability thresholds were determined using the Youden index. Detailed classification performance metrics, including accuracy, sensitivity, specificity, predictive values, and agreement statistics, are reported in Supplementary Table 3. All machine learning analyses were exploratory and intended to complement conventional regression analyses.

**Supplementary Figure 3. Exploratory random forest feature importance analysis for prediction of pathological complete response**


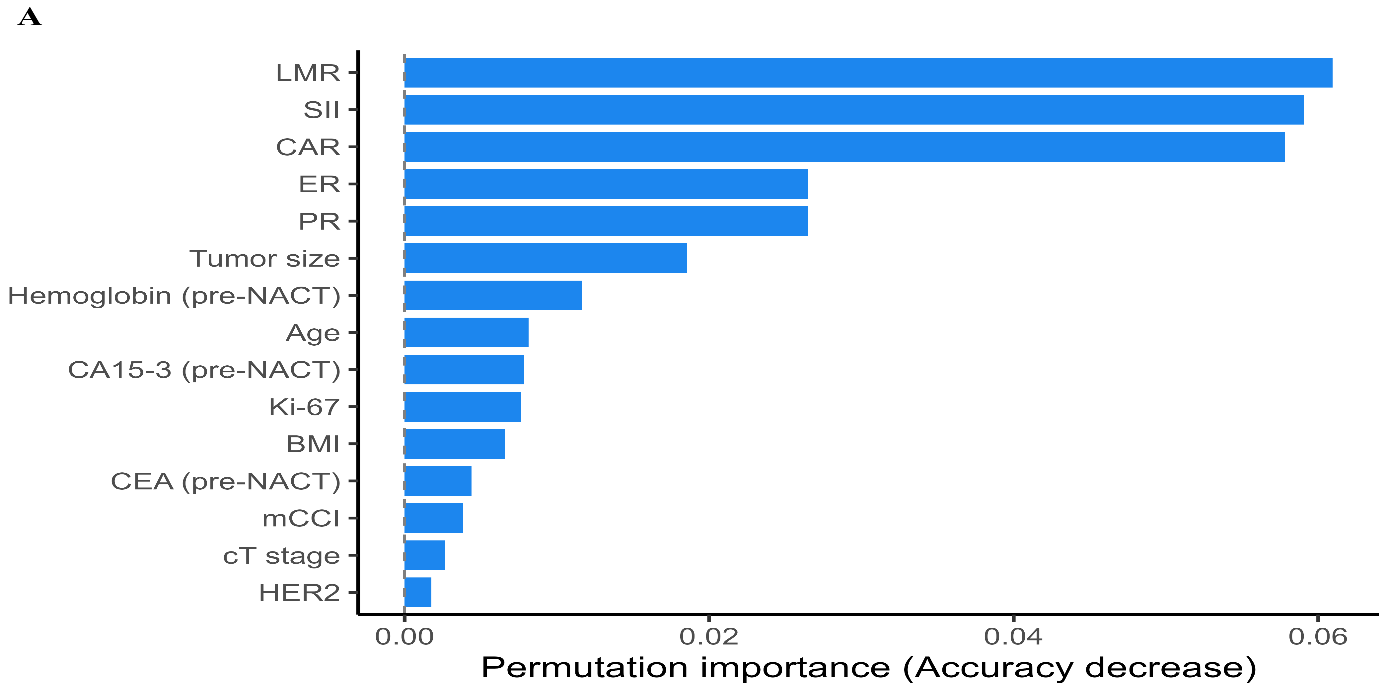


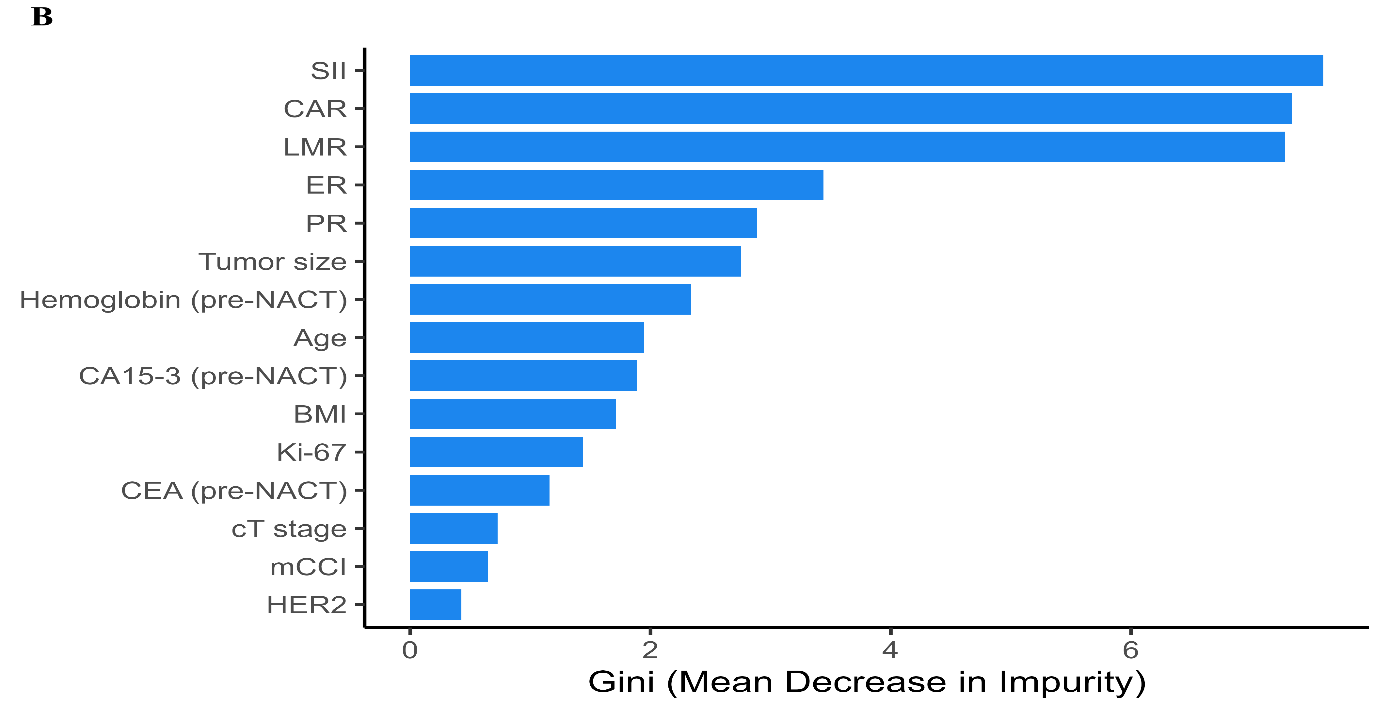


**Abbreviations:** BMI, body mass index; CA15-3, cancer antigen 15-3; CAR, C-reactive protein–to–albumin ratio; CEA, carcinoembryonic antigen; cT stage, clinical tumor stage; ER, estrogen receptor; HER2, human epidermal growth factor receptor 2; LMR, lymphocyte-to-monocyte ratio; mCCI, modified Charlson Comorbidity Index; NACT, neoadjuvant chemotherapy; pCR, pathological complete response; PR, progesterone receptor; SII, systemic immune-inflammation index.

**(A)** Permutation importance–based feature ranking for prediction of pathological complete response.
**(B)** Gini (mean decrease in impurity) –based feature ranking for prediction of pathological complete response.

Feature importance was derived from exploratory random forest models constructed to support and contextualize findings from conventional regression analyses. Permutation importance reflects the decrease in model accuracy after random shuffling of each feature, whereas Gini importance represents the mean decrease in node impurity attributable to each variable across all trees. Higher values indicate greater relative contribution to model predictions. Feature rankings are presented for descriptive purposes only and should not be interpreted as causal effects or independent predictors.

**Supplementary Figure 4. Exploratory random forest feature importance analysis for prediction of radiological response**


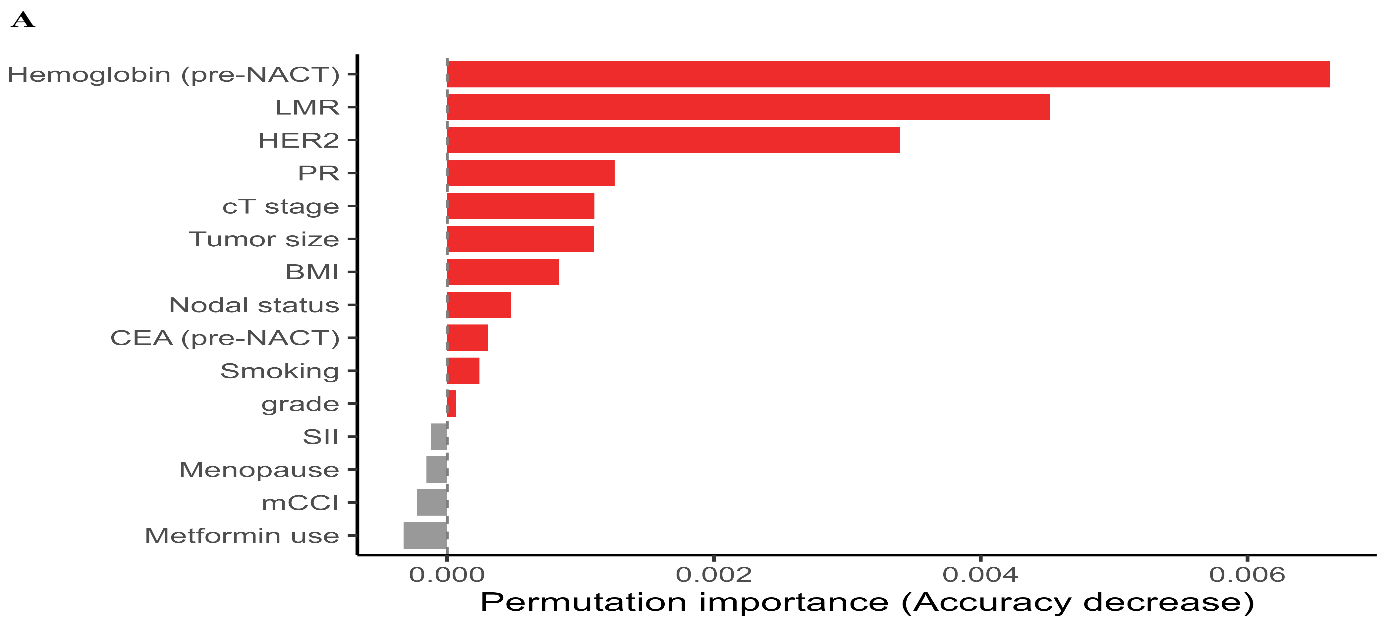


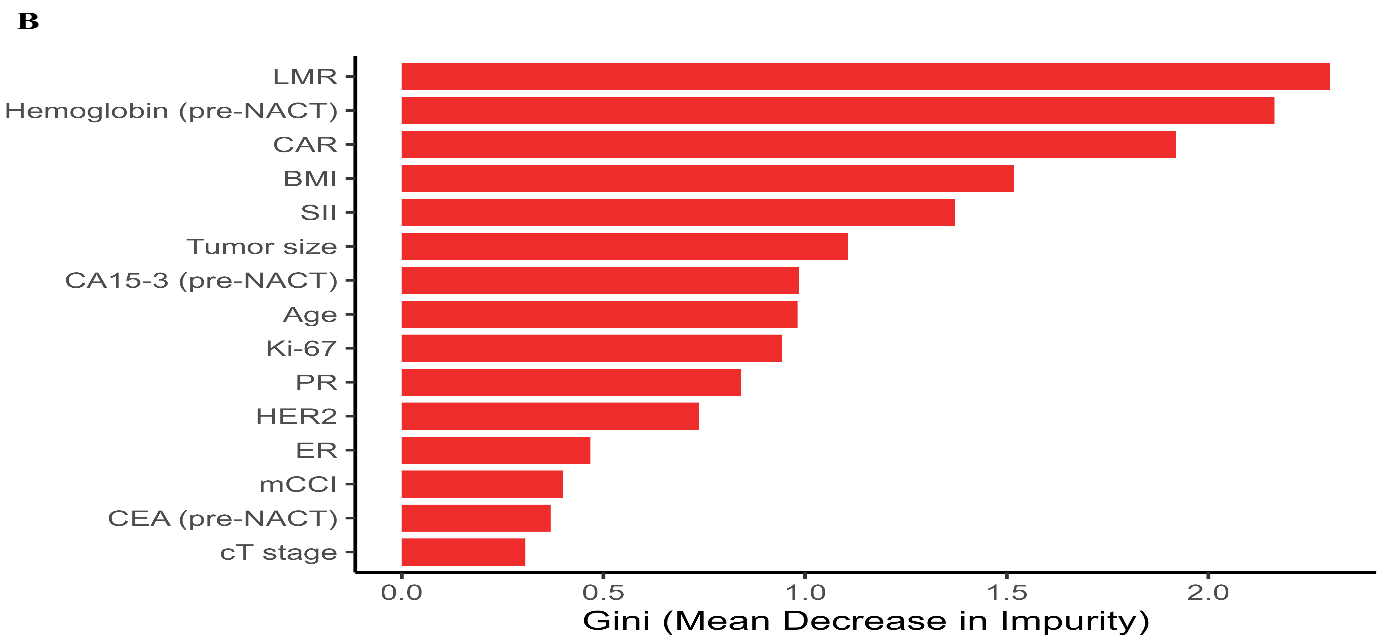


**Abbreviations:** BMI, body mass index; CA15-3, cancer antigen 15-3; CAR, C-reactive protein–to–albumin ratio; CEA, carcinoembryonic antigen; cT stage, clinical tumor stage; ER, estrogen receptor; HER2, human epidermal growth factor receptor 2; LMR, lymphocyte-to-monocyte ratio; mCCI, modified Charlson Comorbidity Index; NACT, neoadjuvant chemotherapy; PR, progesterone receptor; SII, systemic immune-inflammation index.

**(A)** Permutation importance–based feature ranking for prediction of radiological response. **(B)** Gini (mean decrease in impurity) –based feature ranking for prediction of radiological response.

Feature importance was assessed using two complementary approaches: permutation importance, which reflects the decrease in model accuracy after random shuffling of individual variables, and Gini importance, which represents the mean decrease in impurity across decision trees. Higher values indicate greater relative contribution of the corresponding variable to model predictions. Analyses were performed using random forest classifiers and are presented for exploratory purposes.
